# Supplementary material for: INO80 participates in the pathogenesis of recurrent miscarriage by epigenetically regulating trophoblast migration and invasion
Source: PubMed Central journal article supplement (PMC8051727; doi:10.1111/jcmm.16322), 2021-03-16
Supplement: JCMM-25-3885-s001.pdf [file JCMM-25-3885-s001.pdf]

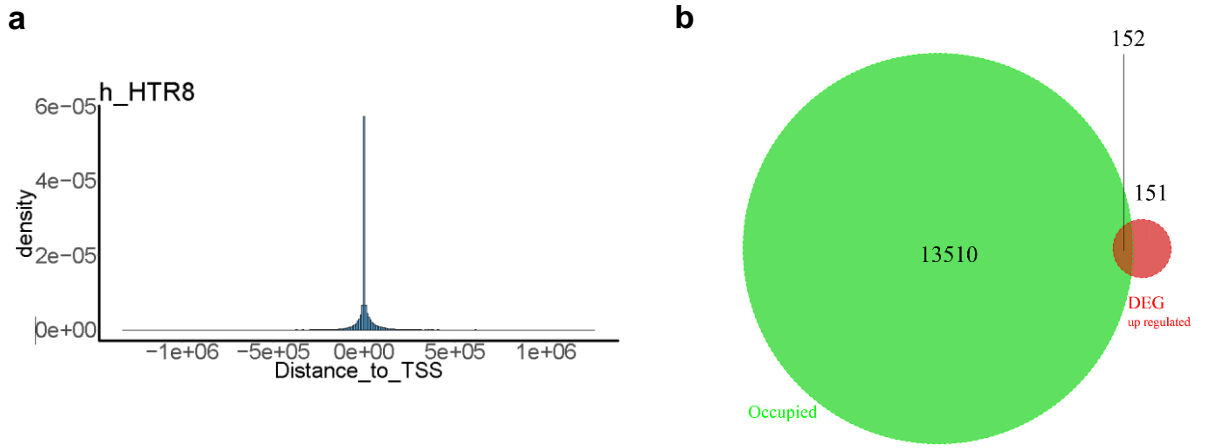

**FIGURE S2.** (a) Ino80 peak distribution in the genome. (b) Venn diagram to show the overlaps between INO80 chromatin immunoprecipitation (ChIP) signal and INO80 knockdown-upregulated genes.
