# Supplementary material for: INO80 participates in the pathogenesis of recurrent miscarriage by epigenetically regulating trophoblast migration and invasion
Source: PubMed Central journal article supplement (PMC8051727; doi:10.1111/jcmm.16322), 2021-03-16
Supplement: JCMM-25-3885-s002.pdf [file JCMM-25-3885-s002.pdf]

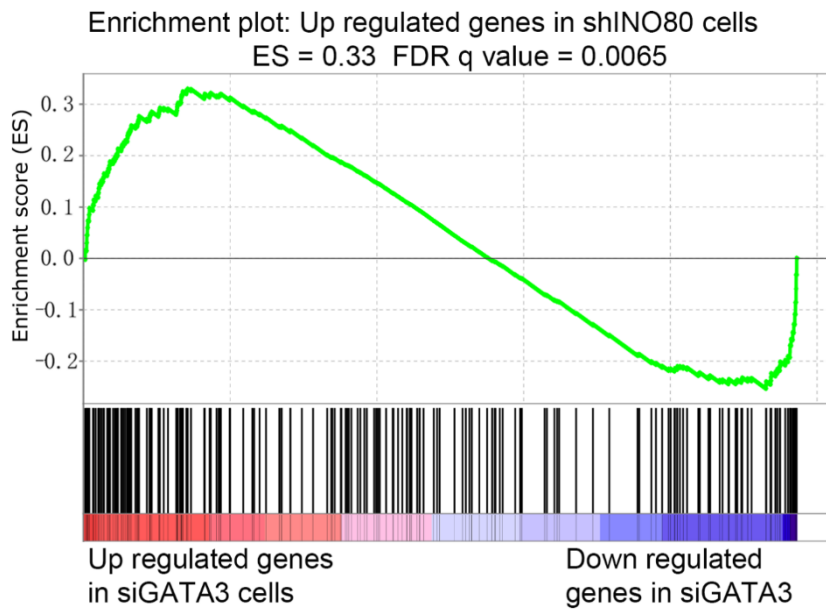

**FIGURE S1.** Gene set enrichment analysis (GSEA) showing that INO80 silencing-upregulated genes were enriched for genes that were high expressed in villus tissues of URM.
